# Supplementary material for: Mutations in the mitochondrial GTPase mitofusin 2 cause Charcot-Marie-Tooth neuropathy type 2A
Source: Springer Nature journal article supplement (doi:10.1038/ng1341), 2004-04-04
Supplement: ng1341-S1.pdf [file ng1341-S1.pdf]

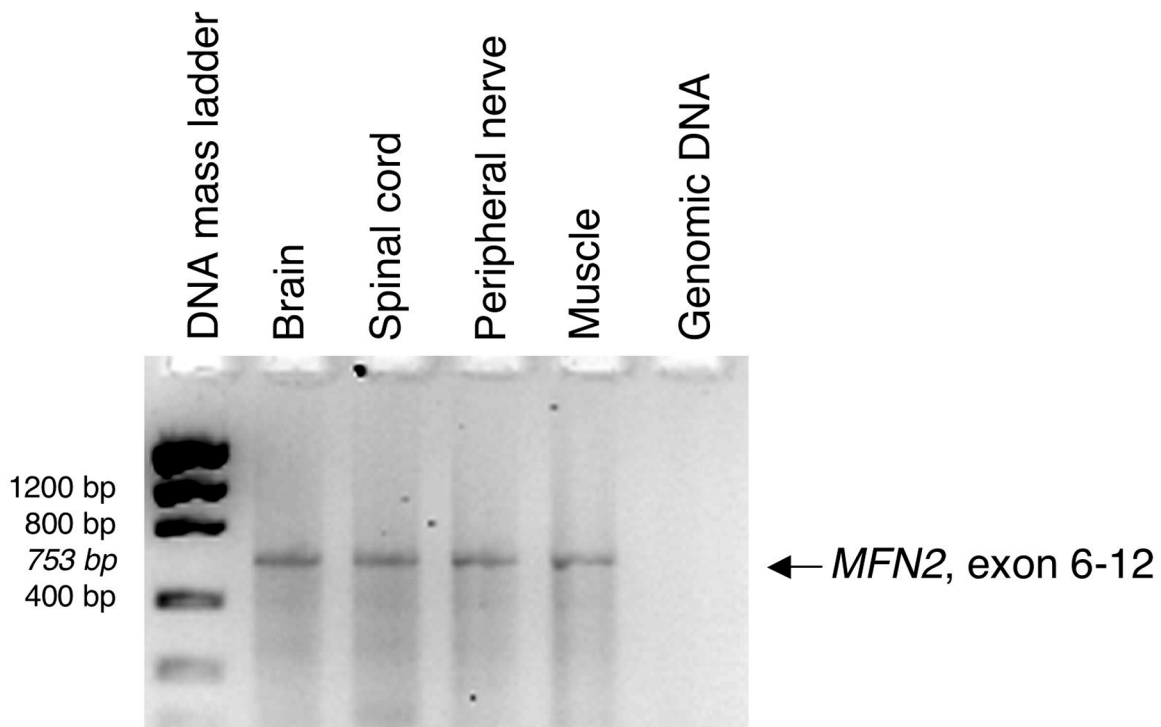

### Supplementary Figure 1

We demonstrated the presence of *MFN2* transcripts in human tissue samples from brain, spinal cord, peripheral nerve and muscle by RT-PCR. After extraction of mRNA (RNeasy, Qiagen, Hilden, Germany) and transcription into cDNA applying random primers (Reverse Transcriptase System, Promega, Madison, USA), we performed a standard PCR using the primers MitRT ex6-12 provided in Supplementary Table 5. The PCR products were visualized in a 2% agarose gel stained with ethidium bromide. Direct sequencing of the RT-PCR product confirmed specificity. We obtained informed consent from the subjects for the use of human, and an Ethical Committee of the University Hospital of the RWTH Aachen gave approval.
